# Supplementary material for: Feeder-Free Derivation of Human Induced Pluripotent Stem Cells with Messenger RNA
Source: PubMed Central journal article supplement — Sci Rep. 2012 Sep 14;2:657. doi: 10.1038/srep00657 (PMC3442198; doi:10.1038/srep00657), 2012-09-14

# Feeder-Free Derivation of Human Induced Pluripotent Stem Cells with Messenger RNA

Luigi Warren<sup>1</sup>, Yuhui Ni<sup>1,2</sup>, Jiwu Wang<sup>\*1,3</sup> and Xirong Guo<sup>\*2</sup>

1. Allele Biotechnology & Pharmaceuticals, Inc., San Diego, CA
2. Nanjing Maternity and Child Medical Institute, Nanjing Medical University  
Affiliated Nanjing Maternity and Child Health Care Hospital
3. The Scintillon Institute, San Diego, CA

\*Corresponding authors

## Supplementary Information

**Supplementary Figure S1. Production of mRNA Cocktails.** (a) Schematic summarizing the procedure for making mRNA reprogramming cocktails. (b) Synthetic mRNA products encoding multiple RFs visualized on a 2% agarose gel. 500 ng of RNA was loaded per gel lane.

**Supplementary Movie 1.** Video showing beating cardiomyocytes derived from the M<sub>3</sub>O-derived iPSC clone documented in Figs. 1b-e by in vitro differentiation to the mesodermal lineage.

**Supplementary Movie 2.** Time-lapse sequence of 10X phase images showing the emergence of hESC-like colonies within a marked field in a feeder-free iPSC derivation performed on XFF cells seeded at 100K per well and subjected to 9 days of 400 ng/mL 24-hour Stemfect transfections with the M<sub>3</sub>O/c-Myc-based 6-factor reprogramming cocktail.

# Supplementary Figure S1

**A**

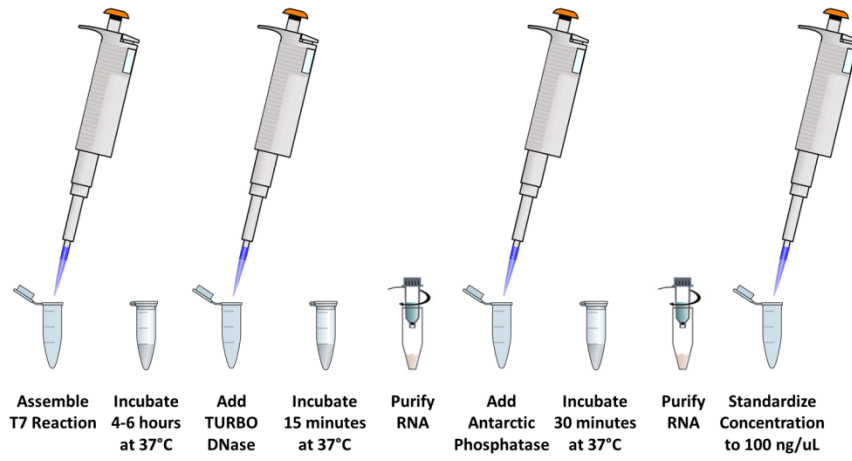

Pool RF mRNAs to Produce Reprogramming Cocktails

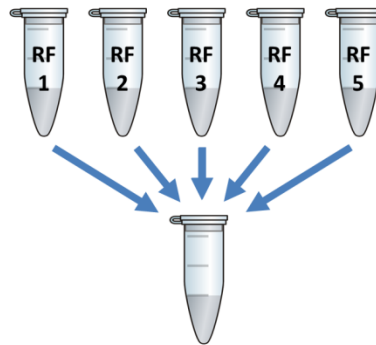

**B**

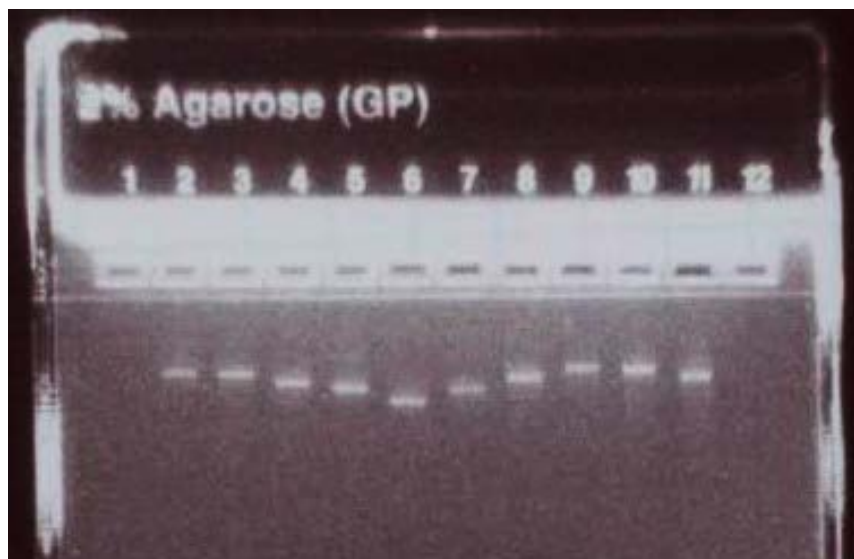

Supplement: srep00657-s1.pdf [file srep00657-s1.pdf]
